# Supplementary material for: Effect of Flexibility Training Associated with Multicomponent Training on Posture and Quality of Movement in Physically Inactive Older Women: A Randomized Study
Source: MDPI journal article supplement (doi:10.3390/ijerph182010709), 2021-10-13
Supplement: s1 [file s1]

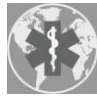

**Table S1:** Postural evaluation (biophotogrammetry), anterior view, at the pre and post experimental period moments.

|                               | MT (n=52)  |            |             | MFT (n=43) |            |               | CG (n=47)  |            |             |
|-------------------------------|------------|------------|-------------|------------|------------|---------------|------------|------------|-------------|
|                               | Pre        | Post       | Effect size | Pre        | Post       | Effect size   | Pre        | Post       | Effect size |
| <u>Head</u>                   |            |            |             |            |            |               |            |            |             |
| HHA (°)‡                      | 3.8 ± 6.0  | 3.0 ± 5.2  | -0.143      | 5.1 ± 5.5  | 2.9 ± 4.4  | -0.444        | 5.6 ± 5.3  | 6.0 ± 4.0  | 0.086       |
| <u>Torso</u>                  |            |            |             |            |            |               |            |            |             |
| HAA (°)‡                      | 4.6 ± 3.5  | 4.5 ± 3.6  | -0.028      | 4.5 ± 3.6  | 3.1 ± 2.7  | -0.444        | 4.4 ± 3.4  | 4.6 ± 2.4  | 0.069       |
| ASISHA (°)‡                   | 4.2 ± 2.7  | 3.5 ± 2.6  | -0.264      | 4.3 ± 2.4  | 2.8 ± 2.4  | <b>-0.625</b> | 4.0 ± 2.6  | 4.6 ± 2.3  | 0.245       |
| ASISAA (°)                    | 1.3 ± 5.1  | 1.0 ± 4.6  | -0.062      | 0.6 ± 5.7  | 0.3 ± 3.8  | -0.063        | 0.1 ± 5.6  | 0.3 ± 3.5  | 0.044       |
| <u>Lower limbs</u>            |            |            |             |            |            |               |            |            |             |
| RLLFA (° × 10 <sup>-1</sup> ) | 0.2 ± 0.2  | 0.1 ± 0.2  | -0.054      | 0.1 ± 0.2  | 0.2 ± 0.1  | 0.063         | 0.1 ± 0.2  | 0.2 ± 0.1  | 0.065       |
| LLLFA (° × 10 <sup>-1</sup> ) | 1.0 ± 1.9  | 1.0 ± 1.6  | 0.000       | 0.1 ± 2.1  | 1.0 ± 1.0  | 0.058         | 0.5 ± 2.0  | 1.0 ± 0.9  | 0.034       |
| LLD (cm)‡                     | 4.1 ± 3.0  | 3.4 ± 2.9  | -0.237      | 4.1 ± 4.3  | 1.8 ± 3.2  | <b>-0.613</b> | 3.2 ± 4.1  | 3.8 ± 2.4  | 0.185       |
| TTA (°)‡                      | 3.9 ± 3.0  | 3.2 ± 1.9  | -0.286      | 2.9 ± 4.1  | 1.8 ± 2.1  | -0.355        | 2.9 ± 4.0  | 2.8 ± 1.9  | -0.034      |
| RQA (°)‡                      | 17.9 ± 1.3 | 17.4 ± 1.3 | -0.385      | 17.8 ± 1.6 | 16.6 ± 1.3 | <b>-0.828</b> | 17.7 ± 1.6 | 17.6 ± 1.1 | -0.074      |
| LQA (°)‡                      | 17.8 ± 2.0 | 17.1 ± 1.7 | -0.378      | 17.7 ± 2.2 | 16.6 ± 1.5 | <b>-0.595</b> | 17.6 ± 2.3 | 17.5 ± 1.5 | -0.053      |

**Note:** MT, multicomponent training; MFT, multicomponent and flexibility training; CG, control group; HHA, horizontal head alignment; HAA, horizontal acromion alignment; ASISHA anterior superior iliac spine horizontal alignment; ASISAA, anterior superior iliac spine acromial angle; RLLFA, right lower limb frontal angle; LLLFA, left lower limb frontal angle; LLD, limb length difference; TTA, tibial tuberosity alignment; RQA, right Q angle; LQA, left Q angle.

‡ Time effect p<0.05.

Bold: effect size ≥ 0.50.

**Table S2:** Postural evaluation (biophotogrammetry), posterior view, at the pre and post experimental period moments.

|                                                 | MT (n=52)       |                |             | MFT (n=43)      |                |               | CG (n=47)      |               |               |
|-------------------------------------------------|-----------------|----------------|-------------|-----------------|----------------|---------------|----------------|---------------|---------------|
|                                                 | Pre             | Post           | Effect size | Pre             | Post           | Effect size   | Pre            | Post          | Effect size   |
| <u>Torso</u>                                    |                 |                |             |                 |                |               |                |               |               |
| HSA (cm $\times 10^{-2}$ ) <sup>‡</sup>         | 5.2 $\pm$ 9.1   | 4.0 $\pm$ 7.5  | -0.145      | 6.3 $\pm$ 8.7   | 3.8 $\pm$ 6.3  | -0.333        | 6.5 $\pm$ 8.7  | 3.8 $\pm$ 6.1 | -0.365        |
| <u>Lower limbs</u>                              |                 |                |             |                 |                |               |                |               |               |
| RLHA ( $^{\circ} \times 10^{-3}$ ) <sup>‡</sup> | 10.4 $\pm$ 16.2 | 9.2 $\pm$ 11.8 | -0.086      | 9.3 $\pm$ 14.2  | 7.0 $\pm$ 10.3 | -0.188        | 9.6 $\pm$ 1.2  | 6.8 $\pm$ 9.1 | <b>-0.544</b> |
| LLHA ( $^{\circ} \times 10^{-3}$ ) <sup>‡</sup> | 15.0 $\pm$ 12.6 | 13.1 $\pm$ 8.2 | -0.183      | 15.8 $\pm$ 10.2 | 11.4 $\pm$ 7.4 | <b>-0.500</b> | 13.0 $\pm$ 8.3 | 9.6 $\pm$ 6.5 | -0.459        |

**Note:** MT, multicomponent training; MFT, multicomponent and flexibility training; CG, control group; HSA, horizontal scapular asymmetry; RLHA, right leg and hindfoot angle; LLHA, left leg and hindfoot angle.

<sup>‡</sup> Time effect  $p < 0.05$ .

**Bold:** effect size  $\geq 0.50$

**Table S3:** Postural evaluation (biophotogrammetry), right lateral view, at the pre and post experimental period moments.

|                                                  | MT (n=52) |            |               | MFT (n=43) |                         |               | CG (n=47)  |                        |              |
|--------------------------------------------------|-----------|------------|---------------|------------|-------------------------|---------------|------------|------------------------|--------------|
|                                                  | Pre       | Post       | Effect size   | Pre        | Post                    | Effect size   | Pre        | Post                   | Effect size  |
| <u>Head</u>                                      |           |            |               |            |                         |               |            |                        |              |
| HAHC7 ( $^{\circ} \times 10^{-1}$ ) <sup>†</sup> | 8.0 ± 0.2 | 6.0 ± 1.0* | <b>-3.333</b> | 8.0 ± 0.2  | 5.0 ± 2.0* <sup>§</sup> | <b>-2.727</b> | 8.0 ± 0.2  | 9.4 ± 1.0 <sup>§</sup> | <b>2.333</b> |
| VAHA ( $^{\circ}$ ) <sup>‡</sup>                 | 0.8 ± 0.7 | 0.7 ± 1.0  | -0.118        | 0.6 ± 1.1  | 0.4 ± 0.8               | -0.211        | 0.5 ± 1.1  | 0.6 ± 0.8              | 0.105        |
| <u>Torso</u>                                     |           |            |               |            |                         |               |            |                        |              |
| VTA ( $^{\circ}$ ) <sup>‡</sup>                  | 0.2 ± 0.6 | 0.1 ± 0.5  | -0.182        | 0.3 ± 0.6  | 0.2 ± 0.3               | -0.222        | 0.3 ± 0.6  | 0.6 ± 0.3              | <b>0.667</b> |
| HA ( $^{\circ}$ ) <sup>‡</sup>                   | 0.5 ± 0.7 | 0.4 ± 0.6  | -0.154        | 0.5 ± 0.8  | 0.1 ± 0.5               | <b>-0.615</b> | 0.4 ± 0.8  | 0.7 ± 0.5              | 0.462        |
| VBA( $^{\circ}$ )                                | 0.4 ± 2.0 | 0.2 ± 0.9  | -0.138        | 0.5 ± 2.1  | 0.2 ± 0.9               | -0.200        | 0.5 ± 2.0  | 0.5 ± 0.9              | 0.000        |
| HPA ( $^{\circ}$ ) <sup>‡</sup>                  | 5.0 ± 3.1 | 4.1 ± 2.7  | -0.310        | 4.6 ± 4.0  | 1.1 ± 2.9               | <b>-1.014</b> | 4.5 ± 4.0  | 4.9 ± 2.7              | 0.119        |
| <u>Lower limbs</u>                               |           |            |               |            |                         |               |            |                        |              |
| AA ( $^{\circ}$ ) <sup>†</sup>                   | 8.3 ± 1.5 | 7.3 ± 2.7* | -0.476        | 8.5 ± 2.2  | 5.4 ± 2.5* <sup>§</sup> | <b>-1.319</b> | 8.0 ± 1.4  | 8.3 ± 2.6              | 0.150        |
| KA ( $^{\circ} \times 10^{-1}$ )                 | 1.0 ± 1.6 | 2.0 ± 19.0 | 0.097         | 1.0 ± 18.0 | 2.0 ± 9.0               | 0.074         | 0.1 ± 17.0 | 1.0 ± 9.0              | 0.069        |

**Note:** MT, multicomponent training; MFT, multicomponent and flexibility training; CG, control group; HAHC7, horizontal alignment of the head with the C7; VAHA, vertical alignment of the head with the acromion, VTA, vertical torso alignment; HA, hip alignment; VBA, vertical body alignment; HPA, horizontal pelvic alignment; AA, ankle angle; KA, knee angle.

<sup>†</sup> Interaction between time and group ( $p < 0.05$ ).

<sup>‡</sup> Time effect ( $p < 0.05$ ).

\*  $p < 0.05$  in relation to the pre-intervention moment in the same group.

**Table S4:** Postural evaluation (biophotogrammetry), left lateral view, at the pre and post experimental period moments.

|                                     | MT (n=52)   |             |               | MFT (n=43)  |                         |               | CG (n=47)   |                        |              |
|-------------------------------------|-------------|-------------|---------------|-------------|-------------------------|---------------|-------------|------------------------|--------------|
|                                     | Pre         | Post        | Effect size   | Pre         | Post                    | Effect size   | Pre         | Post                   | Effect size  |
| <u>Head</u>                         |             |             |               |             |                         |               |             |                        |              |
| HAHC7 ( <sup>o</sup> ) <sup>†</sup> | 8.4 ± 2.7   | 6.8 ± 1.4*  | <b>0.780</b>  | 7.9 ± 2.2   | 5.3 ± 2.0* <sup>§</sup> | <b>1.238</b>  | 7.3 ± 2.9   | 7.2 ± 2.1 <sup>§</sup> | 0.040        |
| VAHA ( <sup>o</sup> ) <sup>‡</sup>  | 0.6 ± 1.4   | 0.4 ± 1.3   | -0.148        | 0.5 ± 1.2   | 0.3 ± 1.0*              | -0.182        | 0.4 ± 1.0   | 0.6 ± 0.7              | 0.235        |
| <u>Torso</u>                        |             |             |               |             |                         |               |             |                        |              |
| VTA ( <sup>o</sup> ) <sup>‡</sup>   | 0.2 ± 0.6   | 0.1 ± 0.5   | -0.182        | 0.3 ± 0.6   | 0.2 ± 0.3               | -0.222        | 0.3 ± 0.6   | 0.6 ± 0.3              | <b>0.667</b> |
| HA ( <sup>o</sup> ) <sup>‡</sup>    | 0.2 ± 0.4   | 0.2 ± 0.3   | 0.000         | 0.4 ± 0.5   | 0.2 ± 0.3               | <b>-0.500</b> | 0.4 ± 0.4   | 0.6 ± 0.2              | <b>0.667</b> |
| VBA ( <sup>o</sup> ) <sup>‡</sup>   | 0.9 ± 0.9   | 0.7 ± 0.7   | -0.250        | 0.6 ± 1.0   | 0.1 ± 0.7               | <b>-0.588</b> | 0.7 ± 1.0   | 0.6 ± 0.7              | -0.118       |
| HPA ( <sup>o</sup> )                | 0.1 ± 2.7   | 0.3 ± 1.3   | 0.100         | 0.1 ± 2.9   | 0.2 ± 1.4               | 0.047         | 0.2 ± 2.8   | 0.2 ± 1.3              | 0.000        |
| <u>Lower limbs</u>                  |             |             |               |             |                         |               |             |                        |              |
| AA ( <sup>o</sup> ) <sup>†</sup>    | 6.4 ± 2.4   | 5.4 ± 2.5*  | -0.408        | 5.6 ± 2.8   | 2.7 ± 3.2* <sup>§</sup> | <b>-0.967</b> | 5.5 ± 3.7   | 6.5 ± 2.9 <sup>§</sup> | 0.303        |
| KA ( <sup>o</sup> ) <sup>‡</sup>    | 51.7 ± 20.5 | 41.6 ± 19.7 | <b>-0.502</b> | 55.1 ± 20.7 | 32.4 ± 17.3             | <b>-1.195</b> | 53.3 ± 21.8 | 56.5 ± 13.8            | 0.180        |

**Note:** MT, multicomponent training; MFT, multicomponent and flexibility training; CG, control group; HAHC7, horizontal alignment of the head with the C7; VAHA, vertical alignment of the head with the acromion; VTA, vertical torso alignment; HA, hip alignment; VBA, vertical body alignment; HPA, horizontal pelvic alignment; AA, ankle angle; KA, knee angle.

<sup>†</sup> Interaction between time and group (p<0.05).

<sup>‡</sup> Time effect (p<0.05).

\* p<0.05 in relation to the pre-intervention moment in the same group.

§ p<0.05 in relation to the MT at the same moment.

Bold: size effect  $\geq 0.50$ .

**Table S5:** Postural evaluation (biophotogrammetry) of the asymmetries of the frontal and sagittal planes at the pre and post experimental period moments.

|                       | MT (n=52)   |              |               | MFT (n=43)  |                |               | CG (n=47)   |             |             |
|-----------------------|-------------|--------------|---------------|-------------|----------------|---------------|-------------|-------------|-------------|
|                       | Pre         | Post         | Effect size   | Pre         | Post           | Effect size   | Pre         | Post        | Effect size |
| FPA (cm) <sup>†</sup> | 45.8 ± 17.2 | 39.3 ± 17.3* | -0.377        | 55.7 ± 20.0 | 35.6 ± 14.1*\$ | <b>-1.179</b> | 57.2 ± 22.4 | 56.8 ± 20.4 | -0.019      |
| SPA (cm) <sup>†</sup> | 34.9 ± 11.0 | 28.8 ± 10.3* | <b>-0.573</b> | 38.4 ± 8.7  | 24.1 ± 9.5*\$  | <b>-1.571</b> | 38.1 ± 10.0 | 39.5 ± 11.9 | 0.128       |

**Note:** MT, multicomponent training; MFT, multicomponent and flexibility training; CG, control group; FPA, frontal plane asymmetry; SPA, sagittal plane asymmetry.

<sup>†</sup> Interaction between group and time (p<0.05).

\* p<0.05 in relation to the pre-intervention moment in the same group.

\$ p<0.05 in relation to the MT at the same moment.

Bold: effect size  $\geq 0.50$ .
